# Supplementary material
Source: PubMed Central journal article supplement (PMC3311130)
Supplement: NIHMS278161-supplement-1.pdf [file NIHMS278161-supplement-1.pdf]

Online Supplementary Materials for the manuscript entitled  
**“ADAM17 mediates neointimal hyperplasia in vasculature”**

Akira Takaguri, Keita Kimura, Akinari Hinoki, Allison M. Bourne, Michael V. Autieri, and  
Satoru Eguchi

Cardiovascular Research Center and Department of Physiology, Temple University  
School of Medicine, Philadelphia, PA.

**Online figure S1 and the figure legend**

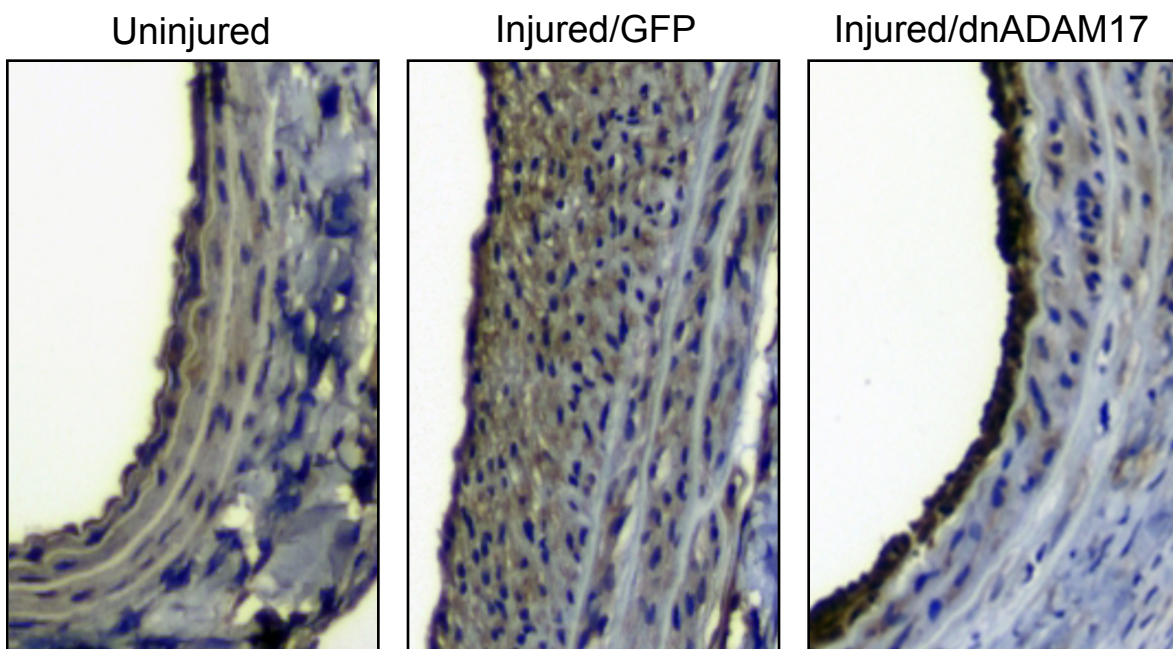

**Figure S1.** Histological analysis of ADAM17 expression in arterial cross-sections obtained after balloon injury. Arterial sections obtained on day 14 after injury with infection of adenovirus encoding GFP or dnADAM17 or from uninjured artery were stained with the antibody for ADAM17. Representative sections (each from 3 rats, x200 magnification) are shown. Note that adenoviral gene transfer of dnADAM17 markedly enhanced the ADAM17 positive area at the neointima even though the neointima formation was much less than the control GFP adenovirus-treated artery. Therefore, the strong signal reflects the efficiency of the ADAM17 gene transfer in the vasculature.
